# Supplementary material for: German Mobile Apps in Rheumatology: Review and Analysis Using the Mobile Application Rating Scale (MARS)
Source: PubMed Central journal article supplement (PMC6699116; doi:10.2196/14991), 2019-08-05
Supplement: mhealth_v7i8e14991_app1.pdf [file mhealth_v7i8e14991_app1.pdf]

| <b>Rater</b>    | <b>Gender</b> | <b>Hardware</b>    | <b>Software</b> |
|-----------------|---------------|--------------------|-----------------|
| iOS rater 1     | male          | Apple iPhone 7     | iOS 12.0.0      |
| iOS rater 2     | male          | Apple iPhone 6     | iOS 12.0.1      |
| iOS rater 3     | male          | Apple iPhone SE    | iOS 12.0.1      |
| iOS rater 4     | female        | Apple iPhone X     | iOS 12.0.0      |
| Android rater 1 | male          | LG G4 Stylus       | Android 6.0     |
| Android rater 2 | male          | Samung Galaxy S7   | Android 6.0     |
| Android rater 3 | female        | Huawei Mate 20 Pro | Android 6.0     |
| Android rater 4 | female        | Sony Experia Z3    | Android 6.0     |
